# Supplementary material for: AtWAKL10, a Cell Wall Associated Receptor-Like Kinase, Negatively Regulates Leaf Senescence in Arabidopsis thaliana
Source: MDPI journal article supplement (doi:10.3390/ijms22094885), 2021-05-05
Supplement: s1 [file s1]

## Supplementary Figure S5

|                          | Gene ID   | Gene Name | <i>wakl10</i> vs WT | <i>OE1</i> vs WT | <i>OE2</i> vs WT |     |
|--------------------------|-----------|-----------|---------------------|------------------|------------------|-----|
| senescence markers       | AT1G79680 | WAKL10    | 0.03                | 115.64           | 61.50            |     |
|                          | AT5G45890 | SAG12     | 0.96                | 0.95             | 0.93             |     |
|                          | AT4G22920 | SGR1      | 0.94                | 0.92             | 0.89             |     |
|                          | AT3G44880 | PAO       | 0.98                | 0.94             | 0.92             |     |
|                          | AT5G38410 | RBCS3B    | 0.84                | 0.88             | 0.85             |     |
| cell expansins           | AT1G69530 | EXPA1     | 0.57                | 1.23             | 1.00             |     |
|                          | AT3G29030 | EXPA5     | 0.34                | 0.96             | 0.84             |     |
|                          | AT2G28950 | EXPA6     | 0.48                | 1.12             | 0.93             |     |
|                          | AT2G40610 | EXPA8     | 0.16                | 0.98             | 0.84             |     |
|                          | AT1G26770 | EXPA10    | 0.35                | 1.13             | 0.97             |     |
|                          | AT1G20190 | EXPA11    | 0.13                | 1.32             | 1.16             |     |
|                          | AT4G28250 | EXPB3     | 0.32                | 1.05             | 1.12             |     |
| defense responsive genes | AT1G10550 | XTH33     | 3.72                | 0.02             | 0.03             | *** |
|                          | AT2G14610 | PR1       | 1.17                | 19.67            | 16.69            | *** |
|                          | AT1G75040 | PR5       | 0.76                | 16.64            | 11.45            | *** |
|                          | AT2G43570 | CHI       | 1.41                | 12.48            | 8.28             | *** |
|                          | AT1G02450 | NIMIN1    | 1.54                | 14.34            | 8.44             | *** |
|                          | AT3G45860 | CRK4      | 1.07                | 2.87             | 2.25             | *   |
|                          | AT4G23210 | CRK13     | 1.57                | 7.34             | 4.15             | *** |
|                          | AT4G23280 | CRK20     | 1.39                | 4.12             | 3.61             | **  |
|                          | AT4G23140 | CRK6      | 1.24                | 11.34            | 8.08             | *** |
|                          | AT4G23150 | CRK7      | 1.33                | 10.75            | 7.44             | *** |
|                          | AT4G23310 | CRK23     | 1.65                | 5.16             | 4.28             | *** |
|                          | AT5G24110 | WRKY30    | 1.03                | 4.85             | 5.22             | *** |
|                          | AT5G22570 | WRKY38    | 0.94                | 3.44             | 4.52             | **  |
|                          | AT5G26170 | WRKY50    | 1.30                | 3.56             | 2.32             | *   |
|                          | AT5G64810 | WRKY51    | 1.41                | 9.23             | 6.19             | *** |
|                          | AT2G46400 | WRKY46    | 0.33                | 1.05             | 1.15             |     |
|                          | AT3G56400 | WRKY70    | 0.49                | 0.98             | 1.02             |     |

**Supplementary Figure S5.** Further confirmation of the relative expression levels of genes encoding cell expansins and those involved in defense responses in senescent leaves of *AtWAKL10 OE1* line. Leaves 6 and 7 with less than 20% leaf area yellowing were collected from wild type, *wakl10* mutant and both *AtWAKL10 OE* lines for transcriptional expression analysis. The relative expression levels of tested transcripts in *AtWAKL10 OE1* line showed a similar trend as that in *AtWAKL10 OE2* line. Data were averages of biological triplicates. Significant differences for *OE1* compared with the wild type were indicated by asterisks and determined by Student's *t*-test (\**p* < 0.05; \*\**p* < 0.01 and \*\*\**p* < 0.001).
