# Supplementary material for: AtWAKL10, a Cell Wall Associated Receptor-Like Kinase, Negatively Regulates Leaf Senescence in Arabidopsis thaliana
Source: MDPI journal article supplement (doi:10.3390/ijms22094885), 2021-05-05
Supplement: s1 [file s1]

## Supplementary Figure S1

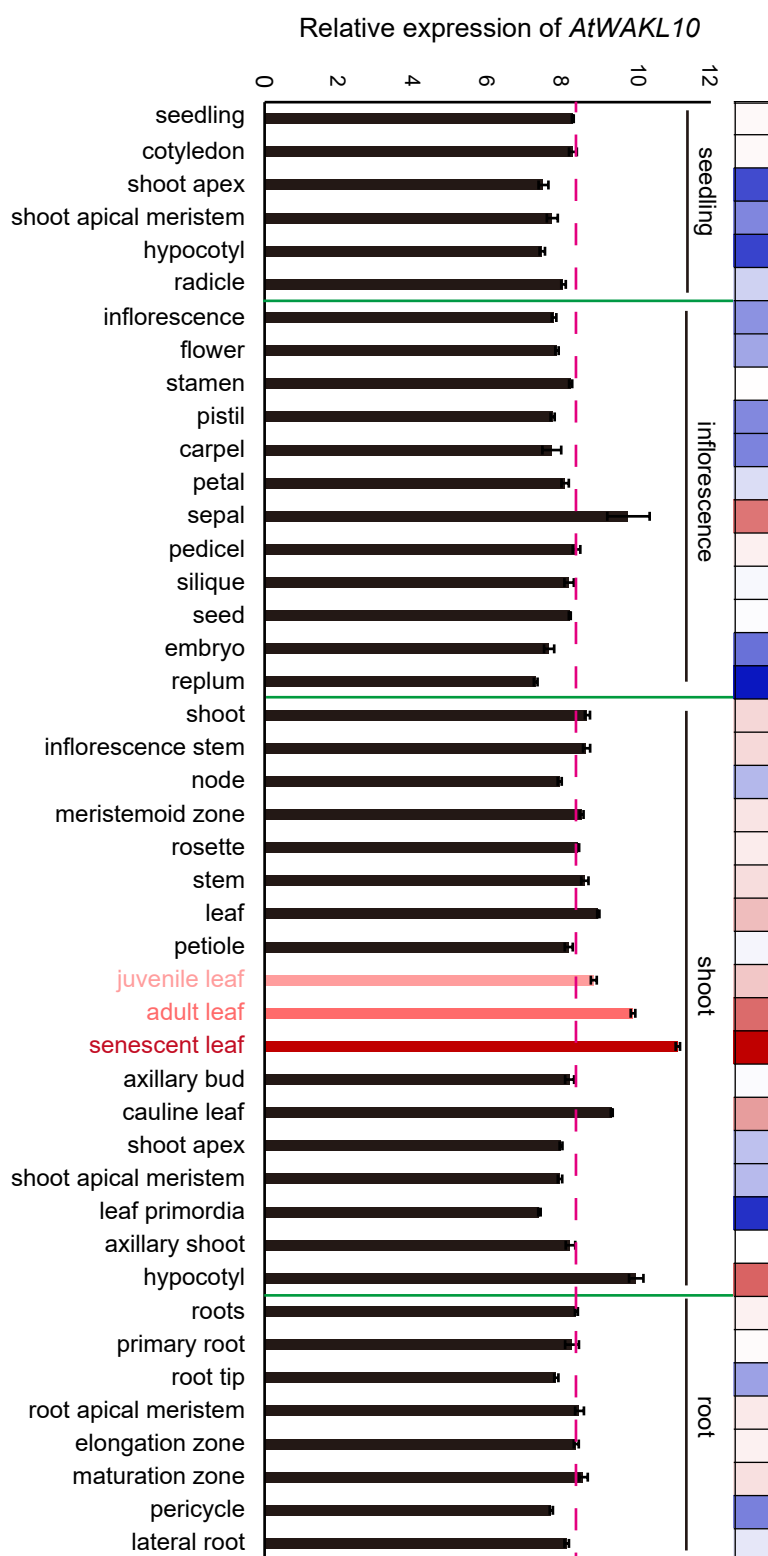

**Supplementary Figure S1.** The predicted developmental tissue expression pattern of *AtWAKL10* generated from GENEVESTIGATOR.
