# Supplementary material for: AtWAKL10, a Cell Wall Associated Receptor-Like Kinase, Negatively Regulates Leaf Senescence in Arabidopsis thaliana
Source: MDPI journal article supplement (doi:10.3390/ijms22094885), 2021-05-05
Supplement: s1 [file s1]

Supplementary Figure S2

A

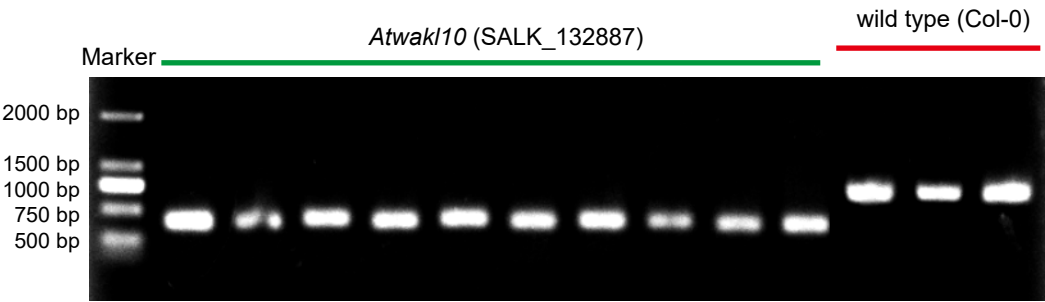

B

|             |                                                                                   |      |
|-------------|-----------------------------------------------------------------------------------|------|
| AtWAKL10    | CCATAAATCACCTGTACACCGTATATAATATCGTACACCTTCACCTATTGTGTACACCTCATATTCAAAAGATAAAACC   | 80   |
| SALK_132887 | -----                                                                             | 0    |
| AtWAKL10    | ATTTTGTCAAGTGATAATATACAAAACAAAGTTTAAATAATAATAATATGAGATTAGTGTACATAAAAGTGTACAAATG   | 160  |
| SALK_132887 | --TTTTCGCGG-----ATTCGGAACCAACATCAAA-----                                          | 28   |
| AtWAKL10    | TTAGTGTACATAAGTAAAAATGTATAATCATTACTTTTCATTTAATGGTATACACCATTATGGTTAATTTAATAGTATACA | 240  |
| SALK_132887 | -----CAGGATTTTCGCTGCTGGGGCAAACCAAGCGTGG-----                                      | 62   |
| AtWAKL10    | TGATGGTGTACACCATTATATTTTTTATTAATTTATGAACAATTATTATTTTATTTTATAAATATGAGATAAATAGAAATA | 520  |
| SALK_132887 | -----                                                                             | 62   |
| AtWAKL10    | TTTTAGAAGATATGTATAAAATGATTTGGTGTATAAGTGTTAGTGTACAAACTATGTTTTAATGCTGGTGTACGAGAAT   | 400  |
| SALK_132887 | -----ACCGCTTGCTGCA-----                                                           | 75   |
| AtWAKL10    | TATAATTA AAAACATATAAATCATCTTGTTTTTGGAGAAGAAATTATTTTTTAAAAATAATTTATTTTATAAAATTC    | 480  |
| SALK_132887 | -----                                                                             | 75   |
| AtWAKL10    | AAAAGATGAATATGAAAAAATAACTATAATATAATAAAAAATAGTTCTAAATAGTTAAATAATATAAAAAGTTTGAC     | 560  |
| SALK_132887 | -----                                                                             | 75   |
| AtWAKL10    | CCATATTTTTTCATATAAAGTAAAGGTAATGGTATTTGACATATTTTTGTCTTTTAGCTTATTACACATAACCTCT      | 640  |
| SALK_132887 | ---ACTCTCTC-----AGGGCCAGGCGGTG-----                                               | 97   |
| AtWAKL10    | ATTTTCACAAAAAAGTAAAAAAGTGTCTATTTTCACAAATTTCTAAAAAACTACCTACTTCTCAAATTACTTTTTAAAA   | 720  |
| SALK_132887 | -----                                                                             | 97   |
| AtWAKL10    | AGTGTCTACTATTCTAATAAGCCTAAAACAATAAGCTGAGCTAGATTACCTTCTCTATGTTTCTTGCGTTCATGCGTGTG  | 800  |
| SALK_132887 | -----AAGGGCAATCAGCTG-----TTGCCGCTCTCACTGGTG-----                                  | 130  |
| AtWAKL10    | ACCTTACAAAAGAAATCCAAAAACGCAACTCTGACTAATGTTTCAGCAGATCATAACACATAATAAACATGCATGAGC    | 880  |
| SALK_132887 | -----AAAAGAAAAACC-----ACCCAGTACATTAAAAACGTCCGCAA--                                | 169  |
| AtWAKL10    | TCTACAGATACTTGTCTCTTTTGTGATTTTAATTAGCCACGTTTAAATCTAGAGTCGGATTGTGATAGTTACAGTGGAA   | 960  |
| SALK_132887 | -----TCTGTTATTAAGTTGTCTAAGCGTCAATTT-----                                          | 199  |
| AtWAKL10    | ATTTCTCCTCGCGACCTAAACAGTCACGTTTTGATATTTTTCTTTTTCTCGTAAATAAATGGAGGAATATAAAATATT    | 1040 |
| SALK_132887 | -----CTTTACACC-----ACAATATATC-----                                                | 218  |
| AtWAKL10    | GAAATTCAAACAAGGAGGCTCACTGAAAGCAAGAAAAGCTTTCAGTGGAGGACTAGAGAAACAAAGACTGACCAGAGAA   | 1120 |
| SALK_132887 | -----CTGAAAGCAAGAAAAGCTTTCAGTGGAGGACTAGAGAAACAAAGACTGACCAGAGAA                    | 276  |
| AtWAKL10    | GAAAATATGAAAGCGAAATTCAAAGATGAAGACTTATGATTCATTGCTGGGTCAAACATAACACAAGATTTTCCTTCGC   | 1200 |
| SALK_132887 | GAAAATATGAAAGCGAAATTCAAAGATGAAGACTTATGATTCATTGCTGGGTCAAACATAACACAAGATTTTCCTTCGC   | 356  |
| AtWAKL10    | TCATCCTTACAAAACCGTCTCTGCTTTTGTAGCTTTCTTGAGCAGATCATAACAGAAAACATTAATATGAGCTCTAATT   | 2280 |
| SALK_132887 | TCATCCTTACAAAACCGTCTCTGCTTTTGTAGCTTT-----                                         | 391  |
| AtWAKL10    | GTAGTTGTTCTCTT                                                                    | 1294 |
| SALK_132887 | -----                                                                             | 391  |

**Supplementary Figure S2.** Screening of homozygous *atwaki10* mutants and determination of the T-DNA insertion site. Homozygous mutant plants were confirmed by PCR-based genotyping with the LP (left primer) and RP (right primer). The PCR product was sent for sequencing. Sequence alignment was carried out using the Sequence Manipulation Suite.
