# Supplementary material for: AtWAKL10, a Cell Wall Associated Receptor-Like Kinase, Negatively Regulates Leaf Senescence in Arabidopsis thaliana
Source: MDPI journal article supplement (doi:10.3390/ijms22094885), 2021-05-05
Supplement: s1 [file s1]

## Supplementary Figure S3

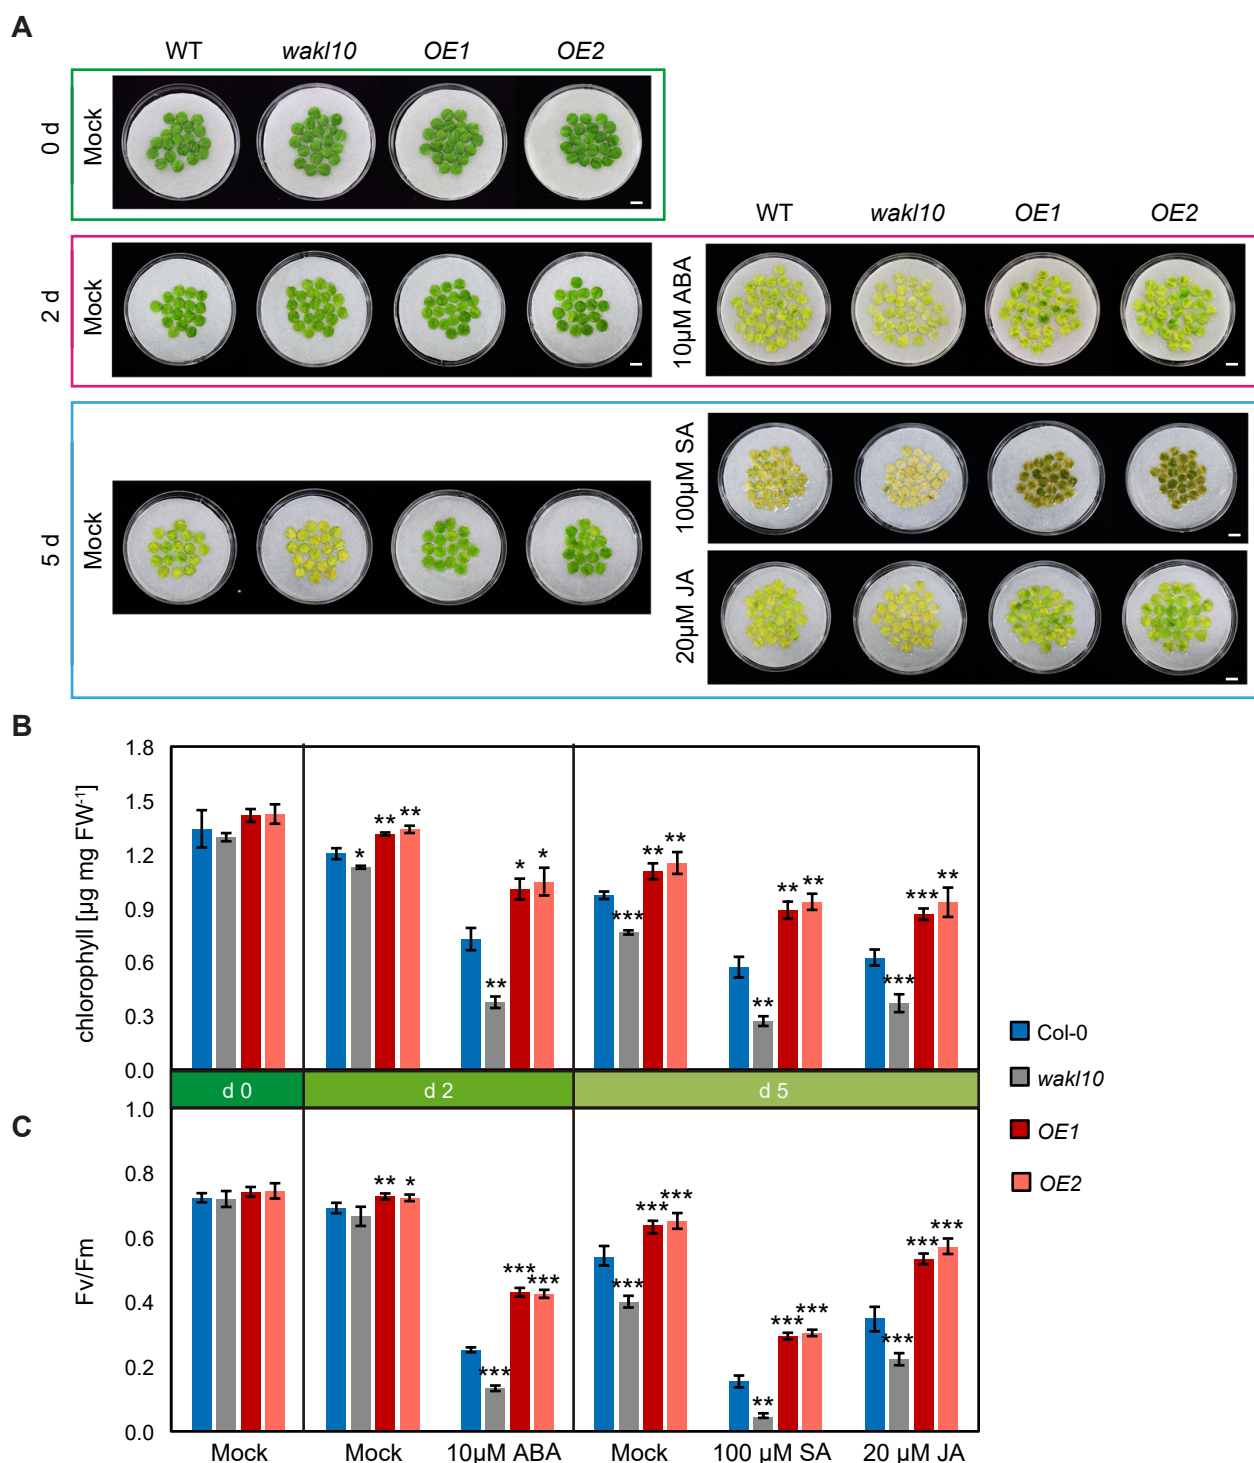

**Supplementary Figure S3.** AtWAKL10 negatively regulated hormone mediated senescence in Arabidopsis. (A) Hormone responsive phenotypes of leaf discs with equal area (diameter = 1 cm) taken from leaves 7, and 8 of 6-week-old wild type, *atwakl10* mutant and *AtWAKL10* OE plants. Leaf discs were treated and untreated (Mock) with various hormones as indicated. Representative images of leaf discs with obvious senescence phenotypes were taken after 0 d of mock treatment (green box), 2 d of mock and 10 μM ABA treatment (light blue box), 5 d of mock, 100 μM SA and 20 μM JA treatments (purple box), respectively. Mock treated leaf discs were used to monitor natural senescence progression. (B) The chlorophyll concentrations and (C) Fv/Fm in hormone treated and untreated leaf discs as indicated in (A). Data were presented as means ± SE (n > 20). For all conditions, statistically significant differences compared with the wild type at each time point were determined by Student's *t*-test (\**p* < 0.05; \*\**p* < 0.01 and \*\*\**p* < 0.001).
